# Supplementary material for: The Psychophysiological Regulation of Pacing Behaviour and Performance Fatigability During Long-Distance Running with Locomotor Muscle Fatigue and Exercise-Induced Muscle Damage in Highly Trained Runners
Source: PubMed Central journal article supplement (PMC6037655; doi:10.1186/s40798-018-0143-2), 2018-07-10
Supplement: 40798_2018_143_MOESM1_ESM.pdf [file 40798_2018_143_MOESM1_ESM.pdf]

## **SUPPLEMENTARY MATERIAL**

### **Title**

The psychophysiological regulation of pacing behaviour and performance fatigability during long-distance running with locomotor muscle fatigue and exercise-induced muscle damage in highly-trained runners

### **Journal**

Sports Medicine - Open

### **Corresponding author:**

Andreas Venhorst

Department of Human Biology, University of Cape Town, Division of Exercise Science & Sports Medicine, Newlands 7725, South Africa;  
andreas.venhorst@gmail.com

### **Co-author(s):**

Dominic P. Micklewright

School of Sport, Rehabilitation and Exercise Sciences, University of Essex,  
Colchester UK. CO4 3SQ

Timothy D. Noakes

Department of Human Biology, University of Cape Town, Division of Exercise Science & Sports Medicine, Newlands 7725, South Africa;

# SUPPLEMENTARY MATERIAL ONE

## Drop-Jump Protocol

### *Jump-Height*

There was a highly significant effect of time on jump-height during the drop-jump protocol ( $F_{3.5, 72.5}=9.2$ ;  $p=0.000$ ;  $\eta_p^2=0.31$ ) with significantly lower jump-heights after eighty drop-jumps.

### *Delayed Onset of Muscular Soreness (DOMS)*

There was a significant treatment  $\times$  time interaction effect on DOMS ( $F_{2.6, 55.4}=4.4$ ;  $p=0.010$ ;  $\eta_p^2=0.17$ ). The investigation of simple (main) treatment effects showed highly significantly greater DOMS at every 12-hour interval ( $F_{1, 21}>18.5$ ;  $p<0.001$ ;  $\eta_p^2 >0.47$ ) peaking 36-hours after the intervention ( $F_{1, 21}=198.1$ ;  $p<0.001$ ;  $\eta_p^2 >0.90$ ). DOMS changed highly significantly during the recovery from the intervention ( $F_{3.4, 71.5}=20.3$ ;  $p=0.000$ ;  $\eta_p^2=0.49$ ) as well as the control time trial ( $F_{2.8, 58.6}=28.6$ ;  $p=0.000$ ;  $\eta_p^2=0.58$ ).

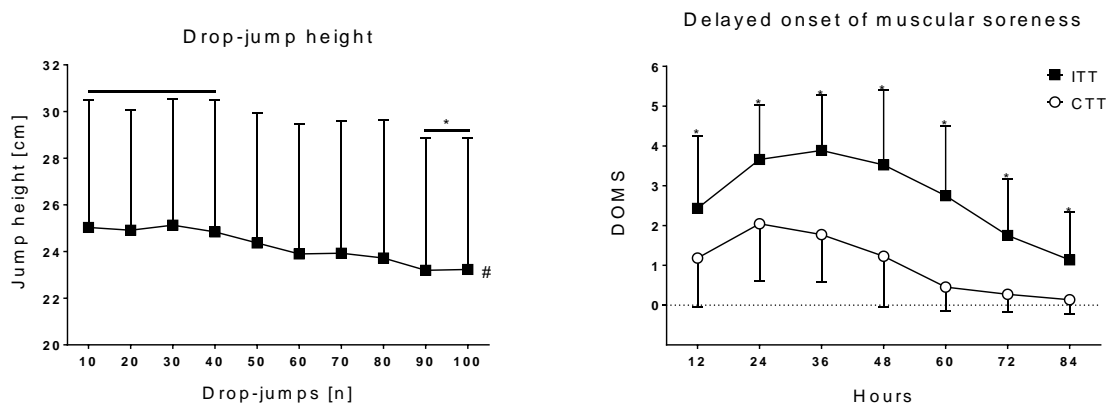

**Figure SM1** Decline in jump height over time during the drop-jump protocol and development of delayed onset of muscular soreness

## SUPPLEMENTARY MATERIAL TWO

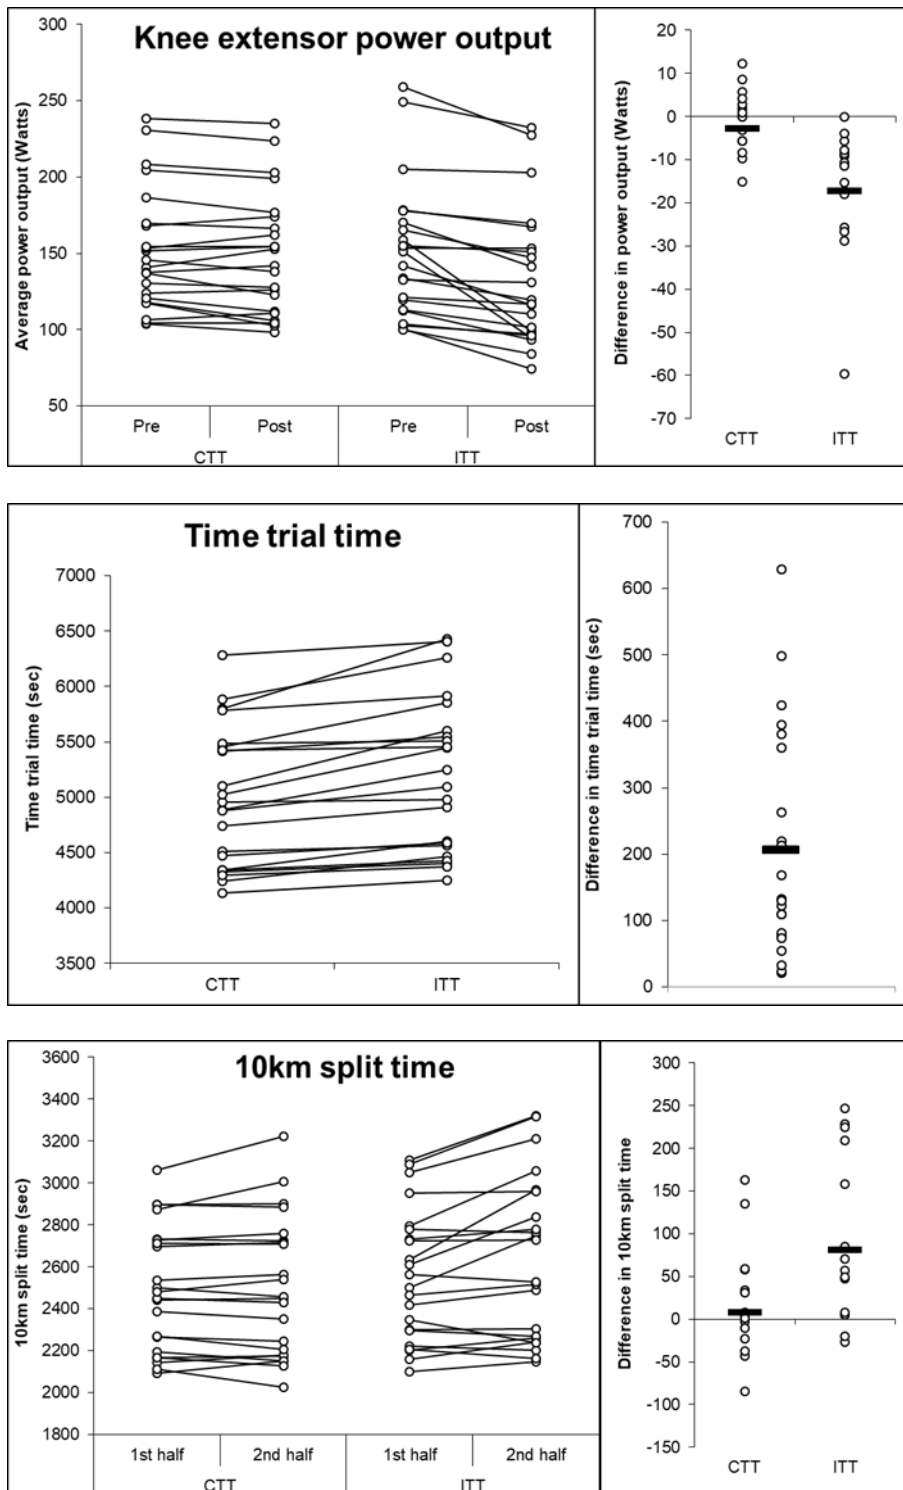

**Figure SM2** Distribution of individual responses to drop-jump protocol in knee extensor power output, 20 km time trial time, and 10 km time trial splits

## SUPPLEMENTARY MATERIAL THREE

### Detailed Results of Two-Way (WW) RM ANOVA in Main Outcome Variables of Interest

#### *Performance Data*

##### *Split Time*

There was a highly significant treatment  $\times$  time interaction effect for 2 km split times ( $F_{3.6, 76.4}=4.9$ ;  $p=0.002$ ;  $\eta_p^2=0.19$ ). The investigation of simple (main) treatment effects showed that runners took significantly more time during each 2-km section of the intervention trial. Except for the first downhill section ( $F_{1, 21}=5.2$ ;  $p=0.033$ ;  $\eta_p^2=0.20$ ), all 2 km split times were highly significantly greater compared to the control trial ( $F_{1, 21}>13.9$ ;  $p<0.001$ ;  $\eta_p^2>0.40$ ). Split times changed highly significantly in accordance with course profile in both treatment groups with simple (main) time effects of ( $F_{1.7, 35.7}=229.6$ ;  $p=0.000$ ;  $\eta_p^2=0.92$ ) in the control ( $F_{2.1, 44.1}=161.4$ ;  $p=0.000$ ;  $\eta_p^2=0.89$ ) and intervention trial, respectively.

##### *Performance Fatigability*

There was a highly significant main time effect for performance fatigability expressed as percentage increase in split time during the intervention time trial compared to the control time trial and was assessed by means of one-way repeated measures analysis of variance ( $F_{4.1, 83.5}=4.0$ ;  $p=0.005$ ;  $\eta_p^2=0.16$ ). The investigation of simple (main) time effects found no significant effects at 2-km intervals.

##### *Heart Rate*

There was a significant treatment  $\times$  time interaction effect for average heart rate at 2-km intervals ( $F_{3.3, 68.8}=2.7$ ;  $p=0.045$ ;  $\eta_p^2=0.12$ ). The investigation of simple (main) treatment effects showed a trend for significantly lower heart rates in runners during the intervention trial from the second climb onwards ( $F_{1, 21}=3.8$ ;  $p=0.066$ ;  $\eta_p^2=0.15$ ) and this reached highly statistical significance during the final 2-km segment compared to the control trial ( $F_{1, 21}=9.5$ ;  $p=0.006$ ;  $\eta_p^2=0.31$ ). Average heart rates increased highly significantly over time and changed according to course profile in both treatment

groups with simple (main) time effects of ( $F_{3.8, 80.3}=71.4$ ;  $p=0.000$ ;  $\eta_p^2=0.77$ ) in the control ( $F_{3.5, 61.9}=53.0$ ;  $p=0.000$ ;  $\eta_p^2=0.72$ ) and intervention trial, respectively.

### ***Perceptive Data***

All perceptive data were additionally analysed with a non-parametric factorial procedure (ART) using common analysis of variance after align rank transform. The results are provided in squared brackets after the parametric test results in parenthesis.

#### *Perceived Physical Strain (6-20 Borg scale)*

There was a trend for a treatment  $\times$  time interaction effect in perceived physical strain during the intervention trial with higher scores during the start phase and increasingly similar scores towards the end ( $F_{5.4, 113.0}=2.1$ ;  $p=0.063$ ;  $\eta_p^2=0.09$ ) [ART:  $F_{6.0, 126.8}=1.8$ ;  $p=0.104$ ;  $\eta_p^2=0.08$ ]. However, the main treatment effect was highly significant with greater perceived physical strain during the intervention trial compared to the control trial ( $F_{1, 21}=12.0$ ;  $p=0.002$ ;  $\eta_p^2=0.36$ ) [ART:  $F_{1, 21}=9.9$ ;  $p=0.005$ ;  $\eta_p^2=0.32$ ]. Perceived physical strain increased highly significantly over time and in accordance with course profile in both control and intervention trial ( $F_{3.6, 75.5}=55.8$ ;  $p=0.000$ ;  $\eta_p^2=0.73$ ) [ART:  $F_{3.9, 81.1}=53.8$ ;  $p=0.000$ ;  $\eta_p^2=0.72$ ].

#### *Perceived Mental Strain (0-14 Borg scale)*

There was a trend for a treatment  $\times$  time interaction effect in perceived mental strain during the intervention trial with higher scores during the start phase and increasingly similar scores towards the end ( $F_{5.5, 115.4}=1.9$ ;  $p=0.089$ ;  $\eta_p^2=0.08$ ) [ART:  $F_{6.1, 127.8}=2.0$ ;  $p=0.064$ ;  $\eta_p^2=0.09$ ]. Neither was there a significant main treatment effect between the intervention and control trial ( $F_{1, 21}=2.9$ ;  $p=0.101$ ;  $\eta_p^2=0.12$ ) [ART:  $F_{1, 21}=2.2$ ;  $p=0.154$ ;  $\eta_p^2=0.09$ ]. However, perceived mental strain increased highly significantly over time and in accordance with course profile in both control and intervention trial ( $F_{3.7, 78.6}=50.9$ ;  $p=0.000$ ;  $\eta_p^2=0.71$ ) [ART:  $F_{4.5, 94.4}=54.9$ ;  $p=0.000$ ;  $\eta_p^2=0.72$ ].

### *Feeling Scale (FS)*

There was a trend for a treatment  $\times$  time interaction effect in valence during the intervention trial with lower scores during the start phase and increasingly similar scores towards the end ( $F_{4.7, 99.0}=2.0$ ;  $p=0.084$ ;  $\eta_p^2=0.09$ ) [ART:  $F_{4.6, 96.6}=1.9$ ;  $p=0.111$ ;  $\eta_p^2=0.08$ ]. However, the main treatment effect was highly significant with greater negative valence during the intervention trial compared to the control trial ( $F_{1, 21}=11.0$ ;  $p=0.003$ ;  $\eta_p^2=0.34$ ) [ART:  $F_{1, 21}=8.5$ ;  $p=0.008$ ;  $\eta_p^2=0.26$ ]. Valence deteriorated highly significantly over time and changed in accordance with course profile in both control and intervention trial ( $F_{3.0, 63.7}=30.0$ ;  $p=0.000$ ;  $\eta_p^2=0.59$ ) [ART:  $F_{3.6, 75.1}=28.9$ ;  $p=0.000$ ;  $\eta_p^2=0.58$ ].

### *Felt Arousal Scale (FAS)*

There was neither a significant treatment  $\times$  time interaction effect ( $F_{9, 189}=1.5$ ;  $p=0.166$ ;  $\eta_p^2=0.07$ ) [ART:  $F_{5.5, 115.0}=1.4$ ;  $p=0.231$ ;  $\eta_p^2=0.06$ ], nor a main treatment effect for felt activation ( $F_{1, 21}=0.1$ ;  $p=0.739$ ;  $\eta_p^2=0.01$ ) [ART:  $F_{1, 21}=0.3$ ;  $p=0.574$ ;  $\eta_p^2=0.01$ ]. However, felt activation increased highly significantly over time and according to course profile in both control and intervention trial ( $F_{2.6, 54.5}=5.7$ ;  $p=0.003$ ;  $\eta_p^2=0.21$ ) [ART:  $F_{2.9, 75.1}=11.8$ ;  $p=0.000$ ;  $\eta_p^2=0.36$ ].

### *Action Crisis Scale (ACRIS)*

There was no significant treatment  $\times$  time interaction effect for perceived action crisis ( $F_{3.2, 66.5}=1.7$ ;  $p=0.170$ ;  $\eta_p^2=0.08$ ) [ART:  $F_{3.3, 69.3}=2.3$ ;  $p=0.075$ ;  $\eta_p^2=0.10$ ]. However, the main treatment effect was highly significant with greater perceived action crisis during the intervention trial compared to the control trial ( $F_{1, 21}=25.7$ ;  $p=0.000$ ;  $\eta_p^2=0.55$ ) [ART:  $F_{1, 21}=27.6$ ;  $p=0.000$ ;  $\eta_p^2=0.57$ ]. Perceived action crisis increased highly significantly over time and in accordance with course profile reaching peak values during the second climb in both control and intervention trial ( $F_{2.2, 45.5}=13.7$ ;  $p=0.000$ ;  $\eta_p^2=0.40$ ) [ART:  $F_{2.3, 47.7}=13.3$ ;  $p=0.000$ ;  $\eta_p^2=0.39$ ].

### *Flow State Scale – short (FSS)*

There was no significant treatment × time interaction effect for perceived flow state ( $F_{3.2, 66.6}=1.1$ ;  $p=0.363$ ;  $\eta_p^2=0.05$ ) [ART:  $F_{3.6, 75.5}=0.9$ ;  $p=0.475$ ;  $\eta_p^2=0.04$ ]. However, the main treatment effect was highly significant with reduced perceived flow state during the intervention trial compared to the control trial ( $F_{1, 21}=13.4$ ;  $p=0.001$ ;  $\eta_p^2=0.39$ ) [ART:  $F_{1, 21}=12.9$ ;  $p=0.002$ ;  $\eta_p^2=0.38$ ]. Perceived flow state decreased highly significantly over time reaching minimum values during the second climb in both control and intervention trial ( $F_{2.1, 44.5}=11.8$ ;  $p=0.000$ ;  $\eta_p^2=0.36$ ) [ART:  $F_{2.3, 46.8}=10.4$ ;  $p=0.000$ ;  $\eta_p^2=0.33$ ].

### ***Haematological Data***

#### *Lactate*

There was a highly significant treatment × time interaction effect for blood lactate concentrations ( $F_{3.6, 76.4}=4.9$ ;  $p=0.002$ ;  $\eta_p^2=0.19$ ). The investigation of simple (main) treatment effects showed that runners had highly significantly lower blood lactate concentrations at the finish of ( $F_{1, 21}=9.4$ ,  $p=0.006$ ;  $\eta_p^2=0.31$ ) and after 30 minutes of recovery from ( $F_{1, 21}=11.7$ ,  $p=0.003$ ;  $\eta_p^2=0.36$ ) the 20-km intervention time trial compared to the control time trial. Blood lactate concentrations increased highly significantly over time peaking at the finish of the 20-km time trial in both treatment groups with simple (main) time effects of ( $F_{2.3, 48.5}=53.1$ ;  $p=0.000$ ;  $\eta_p^2=0.72$ ) in the control trial and ( $F_{2.9, 60.7}=30.4$ ;  $p=0.000$ ;  $\eta_p^2=0.59$ ) in the intervention trial, respectively.

#### *Cortisol*

There was a highly significant treatment × time interaction effect for blood cortisol concentrations ( $F_{2.1, 43.8}=7.1$ ;  $p=0.002$ ;  $\eta_p^2=0.25$ ). The investigation of simple (main) treatment effects showed that runners had significantly lower blood cortisol concentrations after the drop-jump protocol ( $F_{1, 21}=12.5$ ;  $p=0.002$ ;  $\eta_p^2=0.37$ ) and the running economy assessment ( $F_{1, 21}=4.7$ ;  $p=0.042$ ;  $\eta_p^2=0.18$ ), but significantly greater blood cortisol concentrations after 10 km ( $F_{1, 21}=4.4$ ;  $p=0.048$ ;  $\eta_p^2=0.17$ ) and at the

finish of the 20-km intervention time trial ( $F_{1, 21}=7.0$ ;  $p=0.016$ ;  $\eta_p^2=0.25$ ) compared to the control time trial. Blood lactate concentrations increased highly significantly over time peaking after 30 min of recovery in both treatment groups with simple (main) time effects of ( $F_{2.3, 49.1}=89.0$ ;  $p=0.000$ ;  $\eta_p^2=0.81$ ) in the control trial and ( $F_{2.0, 42.3}=111.2$ ;  $p=0.000$ ;  $\eta_p^2=0.84$ ) in the intervention trial, respectively.

### *Interleukin-6*

The assumption of normal distribution in blood interleukin-6 concentrations was violated. Thus, non-parametric analysis of variance after aligned rank transformation was conducted. There was a highly significant treatment  $\times$  time interaction effect for blood interleukin-6 concentrations (ART:  $F_{2.1, 43.6}=8.3$ ;  $p=0.001$ ;  $\eta_p^2=0.28$ ). However, simple (main) treatment effects did not reach statistical significance. Blood interleukin-6 concentrations increased significantly over time and peaked at the finish of the 20-km time trials respectively increasing by two-fold ( $F_{1.8, 38.2}=5.2$ ;  $p=0.012$ ;  $\eta_p^2=0.20$ ) and three-fold ( $F_{3.0, 62.4}=25.0$ ;  $p=0.000$ ;  $\eta_p^2=0.54$ ) during the control and intervention trial.

### *Leucocytes*

There was a highly significant treatment  $\times$  time interaction effect for blood leucocyte count ( $F_{2.6, 55.2}=6.5$ ;  $p=0.001$ ;  $\eta_p^2=0.24$ ). The investigation of simple (main) treatment effects showed that runners had highly significantly greater blood leucocyte count after the drop-jump protocol ( $F_{1, 21}=16.2$ ;  $p=0.001$ ;  $\eta_p^2=0.44$ ) and after 30 minutes of recovery ( $F_{1, 21}=14.5$ ;  $p=0.001$ ;  $\eta_p^2=0.41$ ) from the intervention time trial compared to the control time trial. Blood leucocyte concentrations increased highly significantly over time peaking after 30 min of recovery in both treatment groups with simple (main) time effects of ( $F_{2.4, 50.0}=53.4$ ;  $p=0.000$ ;  $\eta_p^2=0.72$ ) in the control trial and ( $F_{1.7, 35.1}=37.9$ ;  $p=0.000$ ;  $\eta_p^2=0.64$ ) in the intervention trial, respectively.

### *Neutrophils*

There was a highly significant treatment  $\times$  time interaction effect for blood neutrophil count ( $F_{2.0, 43.0}=7.9$ ;  $p=0.001$ ;  $\eta_p^2=0.28$ ). The investigation of simple (main) treatment



effects showed that runners had significantly greater blood neutrophil count after the drop-jump protocol ( $F_{1, 21}=12.1$ ;  $p=0.002$ ;  $\eta_p^2=0.37$ ), at the finish of the 20-km time trial ( $F_{1, 21}=4.5$ ;  $p=0.045$ ;  $\eta_p^2=0.18$ ) and after 30 minutes of recovery ( $F_{1, 21}=16.16$ ;  $p=0.001$ ;  $\eta_p^2=0.44$ ) from the intervention time trial compared to the control time trial. Blood neutrophil count increased highly significantly over time peaking after 30 min of recovery in both treatment groups with simple (main) time effects of ( $F_{2,3, 49.2}=57.3$ ;  $p=0.000$ ;  $\eta_p^2=0.73$ ) in the control trial and ( $F_{1.6, 31.6}=46.9$ ;  $p=0.000$ ;  $\eta_p^2=0.69$ ) in the intervention trial, respectively.

## SUPPLEMENTARY MATERIAL FOUR

### Detailed Results of Three-Way (WWB) RM ANOVA in Main Outcome Variables of Interest

#### *Performance Data*

There were no significant treatment  $\times$  time  $\times$  sex interaction effects for split time ( $F_{3.6, 72.3}=0.8$ ;  $p=0.531$ ;  $\eta_p^2=0.04$ ), performance fatigability ( $F_{3.8, 76.2}=0.9$ ;  $p=0.479$ ;  $\eta_p^2=0.04$ ) or heart rate ( $F_{3.1, 61.9}=0.8$ ;  $p=0.490$ ;  $\eta_p^2=0.04$ ).

However, significant main sex effects were observed for split time ( $F_{1, 20}=51.6$ ;  $p=0.000$ ;  $\eta_p^2=0.72$ ). These effects disappeared after controlling for sex dependent differences in body fat percentage ( $F_{1, 19}=0.6$ ;  $p=0.432$ ;  $\eta_p^2=0.03$ ).

#### *Perceptive Data*

All perceptive data were additionally analysed with a non-parametric factorial procedure (ART) using common analysis of variance after align rank transform. The results are provided in squared brackets after the parametric test results in parenthesis.

There were no significant treatment  $\times$  time  $\times$  sex interaction effects for perceived physical strain ( $F_{5.3, 105.1}=1.4$ ;  $p=0.248$ ;  $\eta_p^2=0.06$ ) [ART:  $F_{9, 180}=1.4$ ;  $p=0.206$ ;  $\eta_p^2=0.06$ ], perceived mental strain ( $F_{5.4, 108.3}=0.9$ ;  $p=0.475$ ;  $\eta_p^2=0.04$ ) [ $F_{9, 180}=1.3$ ;  $p=0.233$ ;  $\eta_p^2=0.06$ ], valence ( $F_{4.5, 90.8}=0.8$ ;  $p=0.570$ ;  $\eta_p^2=0.04$ ) [ART:  $F_{4.5, 89.5}=0.9$ ;  $p=0.487$ ;  $\eta_p^2=0.04$ ], felt activation ( $F_{9, 180}=0.8$ ;  $p=0.585$ ;  $\eta_p^2=0.04$ ) [ART:  $F_{5.4, 108.5}=0.5$ ;  $p=0.761$ ;  $\eta_p^2=0.03$ ], perceived action crisis ( $F_{3.3, 65.5}=1.9$ ;  $p=0.125$ ;  $\eta_p^2=0.09$ ) [ART:  $F_{3.5, 69.2}=1.7$ ;  $p=0.160$ ;  $\eta_p^2=0.08$ ] and perceived flow state ( $F_{3.2, 64.6}=1.1$ ;  $p=0.378$ ;  $\eta_p^2=0.05$ ) [ART:  $F_{3.6, 71.4}=1.1$ ;  $p=0.402$ ;  $\eta_p^2=0.05$ ].

There were also no main sex effects for perceived physical strain ( $F_{1, 20}=0.3$ ;  $p=0.591$ ;  $\eta_p^2=0.02$ ) [ART:  $F_{1, 20}=0.2$ ;  $p=0.625$ ;  $\eta_p^2=0.01$ ], perceived mental strain ( $F_{1, 20}=0.9$ ;  $p=0.349$ ;  $\eta_p^2=0.04$ ) [ART:  $F_{1, 20}=0.8$ ;  $p=0.383$ ;  $\eta_p^2=0.04$ ], valence ( $F_{1, 20}=0.6$ ;  $p=0.447$ ;

$\eta_p^2=0.03$ ) [ART:  $F_{1, 20}=0.5$ ;  $p=0.486$ ;  $\eta_p^2=0.03$ ], felt activation ( $F_{1, 20}<0.0$ ;  $p=0.961$ ;  $\eta_p^2 <0.00$ ) [ART:  $F_{1, 20}<0.0$ ;  $p=0.979$ ;  $\eta_p^2 <0.00$ ], perceived action crisis ( $F_{1, 20}<0.0$ ;  $p=0.917$ ;  $\eta_p^2 <0.00$ ) [ART:  $F_{1, 20}<0.0$ ;  $p=0.845$ ;  $\eta_p^2 <0.00$ ] or perceived flow state ( $F_{1, 20}=0.6$ ;  $p=0.430$ ;  $\eta_p^2 =0.03$ ) [ART:  $F_{1, 20}=0.1$ ;  $p=0.728$ ;  $\eta_p^2 =0.01$ ].

### ***Haematological Data***

There were no significant treatment  $\times$  time  $\times$  sex interaction effects for blood concentrations in lactate ( $F_{2.8, 55.9}=0.4$ ;  $p=0.771$ ;  $\eta_p^2 =0.02$ ), cortisol ( $F_{2.0, 39.9}=1.2$ ;  $p=0.306$ ;  $\eta_p^2 =0.06$ ) and interleukin-6 (ART:  $F_{2.0, 40.3}=1.6$ ;  $p=0.218$ ;  $\eta_p^2 =0.07$ ), but there were trends towards greater blood cell count for female runners during the intervention trial in leucocytes ( $F_{2.9, 57.3}=2.5$ ;  $p=0.067$ ;  $\eta_p^2 =0.11$ ) and neutrophils ( $F_{2.2, 44.0}=2.6$ ;  $p=0.077$ ;  $\eta_p^2 =0.11$ ).

However, significant main sex effects with greater blood concentration in female runners were observed in cortisol ( $F_{1, 20}=7.5$ ;  $p=0.013$ ;  $\eta_p^2 =0.27$ ) as well as greater leucocyte ( $F_{1, 20}=4.7$ ;  $p=0.042$ ;  $\eta_p^2 =0.19$ ) neutrophil counts ( $F_{1, 20}=3.9$ ;  $p=0.063$ ;  $\eta_p^2 =0.16$ ). These effects disappeared after controlling for sex dependent differences in weekly mileage for cortisol ( $F_{1, 19}=1.1$ ;  $p=0.313$ ;  $\eta_p^2 =0.05$ ), leucocytes (ANCOVA:  $F_{1, 19}=0.7$ ;  $p=0.426$ ;  $\eta_p^2 =0.03$ ) and neutrophils (ANCOVA:  $F_{1, 19}=0.3$ ;  $p=0.589$ ;  $\eta_p^2 =0.02$ ), respectively.
